# Supplementary material for: Field and laboratory perspectives on fentanyl and carfentanil decontamination
Source: PubMed Central journal article supplement — Sci Rep. 2024 Oct 25;14:25381. doi: 10.1038/s41598-024-74594-z (PMC11511980; doi:10.1038/s41598-024-74594-z), 2024-10-25
Supplement: 41598_2024_74594_MOESM1_ESM.pdf [file 41598_2024_74594_MOESM1_ESM.pdf]

## Supplementary Information

### Understanding the intricate evaluation of fentanyl and carfentanil decontamination: field and laboratory perspectives

Pernilla Lindén<sup>1,δ</sup>, Lina Mören<sup>1,δ</sup>, Johanna Qvarnström<sup>1</sup>, Nina Forsgren<sup>1</sup>, Cecilia Springer Engdahl<sup>1</sup>, Magnus Engqvist<sup>1</sup>, Jiri Henych<sup>2</sup>, Tobias Tengel<sup>1</sup>, Lars Österlund<sup>3</sup>, Lina Thors<sup>1</sup>, Andreas Larsson<sup>1</sup>, Susanne Johansson<sup>1,\*</sup>

<sup>1</sup> Swedish Defence Research Agency, Division of CBRN Defence and Security, 901 82 Umeå, Sweden.

<sup>2</sup> Institute of Inorganic Chemistry of the Czech Academy of Sciences, 250 68 Husinec-Řež, Czech Republic; <https://orcid.org/0000-0002-5509-2139>

<sup>3</sup> Department of Materials Science and Engineering, The Ångström Laboratory, Uppsala University, P. O. Box 35, SE-75103, Uppsala, Sweden. <https://orcid.org/0000-0003-0296-5247>

<sup>δ</sup> The authors contributed equally to this work.

\* Corresponding author. Email: [susanne.johansson@foi.se](mailto:susanne.johansson@foi.se)

### Table of Contents

|                                                                                         |     |
|-----------------------------------------------------------------------------------------|-----|
| LC/HRMS data for detected degradation products .....                                    | S2  |
| GC/HRMS data for detected degradation products.....                                     | S7  |
| Dose-response curves for N-oxide activation of the human $\mu$ -opioid receptor.....    | S8  |
| Metabolism data of fentanyl- and carfentanil N-oxides in human liver microsomes.....    | S8  |
| Representative SEM images.....                                                          | S9  |
| Stability of fentanyl, fentanyl N-oxide and carfentanil in water and acetonitrile ..... | S11 |

## LC/HRMS data for detected degradation products

**Supplementary table S1.** Degradation products of fentanyl in 10 % H<sub>2</sub>O<sub>2</sub> detected by UHPLC-HRMS after 24 h.

| #        | RT (min) | % signal of fentanyl reference | EIC (m/z) | Ion formula (incl. H <sup>+</sup> )                           | Comment                                      |
|----------|----------|--------------------------------|-----------|---------------------------------------------------------------|----------------------------------------------|
| 1        | 1.28     | <1                             | 233.165   | C <sub>14</sub> H <sub>21</sub> N <sub>2</sub> O              | -C <sub>8</sub> H <sub>8</sub> (norfentanyl) |
| 2        | 2.32     | <1                             | 353.222   | C <sub>22</sub> H <sub>29</sub> N <sub>2</sub> O <sub>2</sub> | + O                                          |
| 3        | 2.36     | <1                             | 353.222   | C <sub>22</sub> H <sub>29</sub> N <sub>2</sub> O <sub>2</sub> | + O                                          |
| 4        | 2.40     | <1                             | 353.222   | C <sub>22</sub> H <sub>29</sub> N <sub>2</sub> O <sub>2</sub> | + O                                          |
| Fentanyl | 2.48     | 34                             | 337.227   | C <sub>22</sub> H <sub>29</sub> N <sub>2</sub> O              |                                              |
| 6        | 2.50     | 59                             | 353.222   | C <sub>22</sub> H <sub>29</sub> N <sub>2</sub> O <sub>2</sub> | + O (N-oxide)                                |
| 7        | 2.53     | 14                             | 353.222   | C <sub>22</sub> H <sub>29</sub> N <sub>2</sub> O <sub>2</sub> | + O (N-oxide)                                |

Extracted ion chromatogram = EIC, retention time = RT.

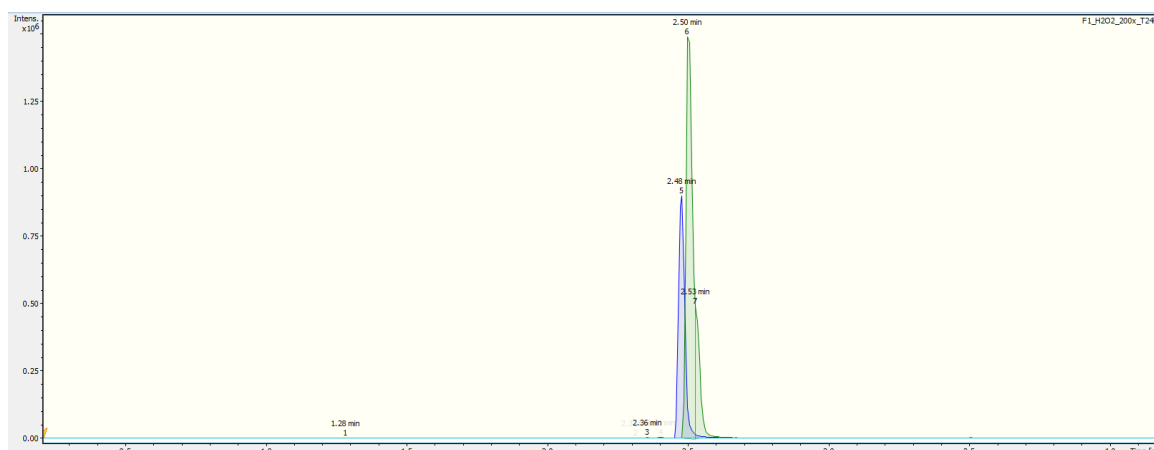

**Supplementary figure S1.** Chromatogram of degradation products of fentanyl in 10 % H<sub>2</sub>O<sub>2</sub> detected by UHPLC-HRMS after 24 h.

**Supplementary table S2.** Degradation products of fentanyl in bleach detected by UHPLC-HRMS after 24 h.

| #        | RT (min) | % signal of fentanyl reference | EIC (m/z) | Ion formula (incl. H <sup>+</sup> )                                           | Comment                                              |
|----------|----------|--------------------------------|-----------|-------------------------------------------------------------------------------|------------------------------------------------------|
| 2        | 0.81     | <1                             | 192.100   | C <sub>11</sub> H <sub>14</sub> NO <sub>2</sub>                               |                                                      |
| 3        | 1.26     | 2.7                            | 233.165   | C <sub>14</sub> H <sub>21</sub> N <sub>2</sub> O                              | -C <sub>8</sub> H <sub>8</sub> (norfentanyl)         |
| 4        | 2.34     | <1                             | 266.100   | C <sub>13</sub> H <sub>16</sub> NO <sub>5</sub>                               | -C <sub>9</sub> H <sub>13</sub> N + O <sub>4</sub>   |
| 5        | 2.43     | 7.6                            | 355.202   | C <sub>21</sub> H <sub>27</sub> N <sub>2</sub> O <sub>3</sub>                 | -CH <sub>2</sub> +O <sub>2</sub>                     |
| Fentanyl | 2.48     | <0.3                           | 337.227   | C <sub>22</sub> H <sub>29</sub> N <sub>2</sub> O                              |                                                      |
| 6        | 2.50     | 20                             | 353.220   | C <sub>22</sub> H <sub>29</sub> N <sub>2</sub> O <sub>2</sub>                 | +O (N-oxide)                                         |
| 7        | 2.59     | <1                             | 437.222   | C <sub>22</sub> H <sub>27</sub> N <sub>2</sub> O <sub>3</sub> Cl <sub>2</sub> |                                                      |
| 8        | 2.81     | <1                             | 369.217   | C <sub>22</sub> H <sub>27</sub> N <sub>2</sub> O <sub>3</sub>                 | -H <sub>2</sub> +O <sub>2</sub>                      |
| 9        | 2.96     | <1                             | 351.207   | C <sub>22</sub> H <sub>27</sub> N <sub>2</sub> O <sub>2</sub>                 | -H <sub>2</sub> +O                                   |
| 10       | 3.03     | 1.4                            | 267.126   | C <sub>14</sub> H <sub>20</sub> N <sub>2</sub> OCl                            | -C <sub>8</sub> H <sub>9</sub> +Cl (norfentanyl+Cl?) |
| 11       | 3.20     | 1                              | 389.163   | C <sub>21</sub> H <sub>26</sub> N <sub>2</sub> O <sub>3</sub> Cl              | -CH <sub>3</sub> +ClO <sub>2</sub>                   |

Extracted ion chromatogram = EIC, retention time = RT.

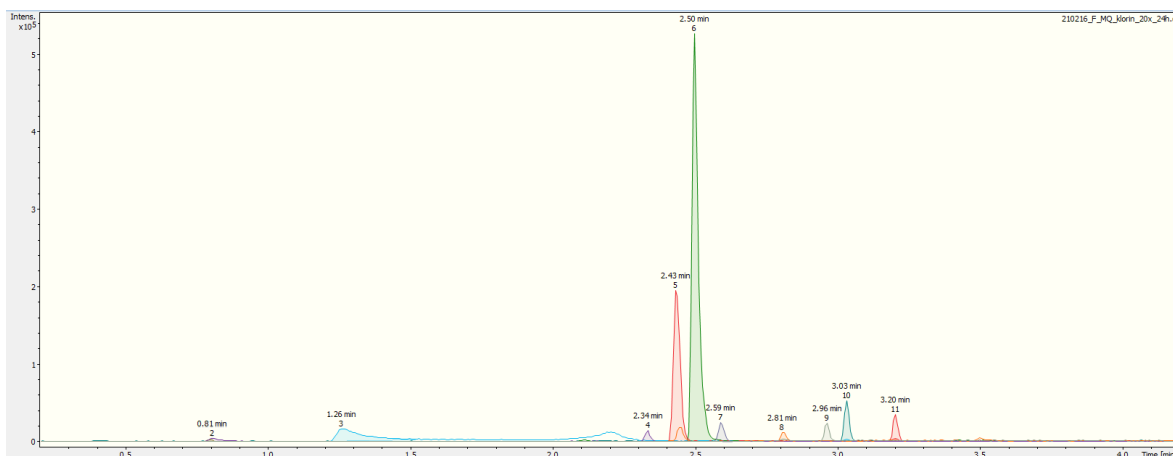

**Supplementary figure S2.** Chromatogram of degradation products of fentanyl in bleach detected by UHPLC-HRMS after 24 h.

**Supplementary table S3.** Degradation products of fentanyl in alledecont MED, detected by UHPLC-HRMS after 26 h.

| #        | RT (min) | % signal of fentanyl reference | EIC ( <i>m/z</i> ) | Ion Formula (incl. H <sup>+</sup> )                                           | Comment                                               |
|----------|----------|--------------------------------|--------------------|-------------------------------------------------------------------------------|-------------------------------------------------------|
| 1        | 0.79     | 3.5                            | 192.102            | C <sub>11</sub> H <sub>14</sub> NO <sub>2</sub>                               | -C <sub>11</sub> H <sub>15</sub> N + O                |
| 2        | 1.13     | <1                             | 233.165            | C <sub>14</sub> H <sub>21</sub> N <sub>2</sub> O                              | -C <sub>8</sub> H <sub>8</sub> (norfentanyl)          |
| 3        | 2.53     | <1                             | 266.103            | C <sub>13</sub> H <sub>16</sub> NO <sub>5</sub>                               |                                                       |
| 4        | 2.67     | <1                             | 255.202            | C <sub>21</sub> H <sub>27</sub> N <sub>2</sub> O <sub>3</sub>                 |                                                       |
| 5        | 2.67     | 1.7                            | 150.091            | C <sub>9</sub> H <sub>12</sub> NO                                             | -C <sub>13</sub> H <sub>17</sub> N                    |
| Fentanyl | 2.68     | 6.7                            | 337.227            | C <sub>22</sub> H <sub>29</sub> N <sub>2</sub> O                              |                                                       |
| 7        | 2.73     | 14.4                           | 353.222            | C <sub>22</sub> H <sub>29</sub> N <sub>2</sub> O <sub>2</sub>                 | + O, N-oxide                                          |
| 8        | 2.78     | 2.3                            | 353.222            | C <sub>22</sub> H <sub>29</sub> N <sub>2</sub> O <sub>2</sub>                 | + O, N-oxide                                          |
| 9        | 2.90     | <1                             | 437.139            | C <sub>22</sub> H <sub>27</sub> N <sub>2</sub> O <sub>3</sub> Cl <sub>2</sub> | -H <sub>2</sub> + Cl <sub>2</sub> O <sub>2</sub>      |
| 10       | 2.98     | 1.3                            | 244.191            | C <sub>13</sub> H <sub>26</sub> NO <sub>3</sub>                               |                                                       |
| 11       | 3.09     | <1                             | 258.089            | C <sub>12</sub> H <sub>17</sub> NO <sub>3</sub> Cl                            | -C <sub>10</sub> H <sub>12</sub> N + ClO <sub>2</sub> |
| 12       | 3.33     | <1                             | 351.207            | C <sub>22</sub> H <sub>27</sub> N <sub>2</sub> O <sub>2</sub>                 | -H <sub>2</sub> + O                                   |
| 13       | 3.40     | 7.5                            | 267.126            | C <sub>14</sub> H <sub>20</sub> N <sub>2</sub> OCl                            | -C <sub>8</sub> H <sub>9</sub> + Cl (norfentanyl+Cl?) |
| 14       | 3.62     | <1                             | 389.163            | C <sub>21</sub> H <sub>26</sub> N <sub>2</sub> O <sub>3</sub> Cl              | -CH <sub>3</sub> + ClO <sub>2</sub>                   |

Extracted ion chromatogram = EIC, retention time = RT.

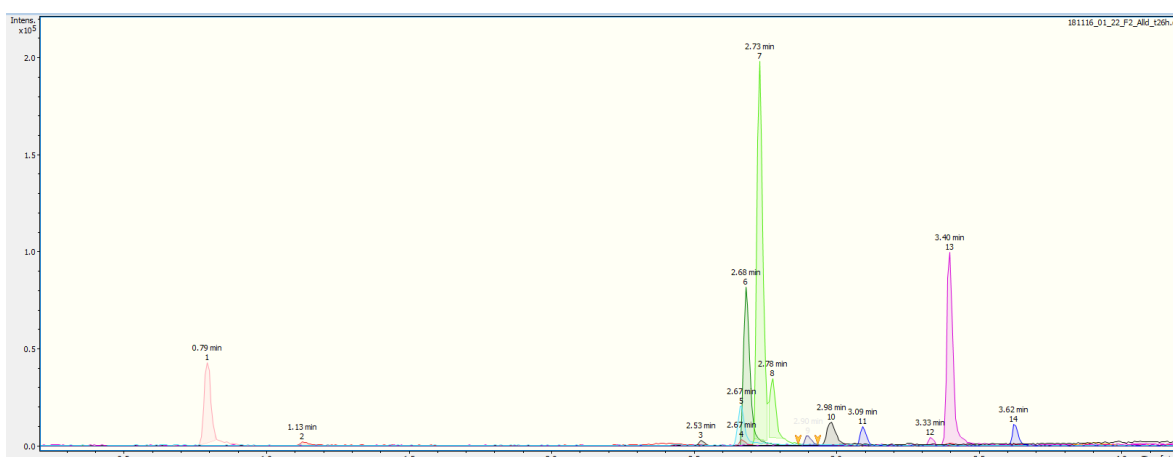

**Supplementary figure S3.** Chromatogram of degradation products of fentanyl in alledecont MED detected by UHPLC-HRMS after 26 h.

**Supplementary table S4.** Degradation products of fentanyl in DahlgrenDecon detected by UHPLC-HRMS after 24 h.

| #        | RT (min) | % signal of fentanyl reference | EIC ( $m/z$ ) | Ion formula (incl. $H^+$ ) | Comment       |
|----------|----------|--------------------------------|---------------|----------------------------|---------------|
| Fentanyl | 2.59     | <0.3                           | 337.227       | $C_{22}H_{29}N_2O$         |               |
| 1        | 2.63     | 107                            | 353.222       | $C_{22}H_{29}N_2O_2$       | + O (N-oxide) |
| 2        | 2.65     | 27                             | 353.222       | $C_{22}H_{29}N_2O_2$       | + O (N-oxide) |

Extracted ion chromatogram = EIC, retention time = RT.

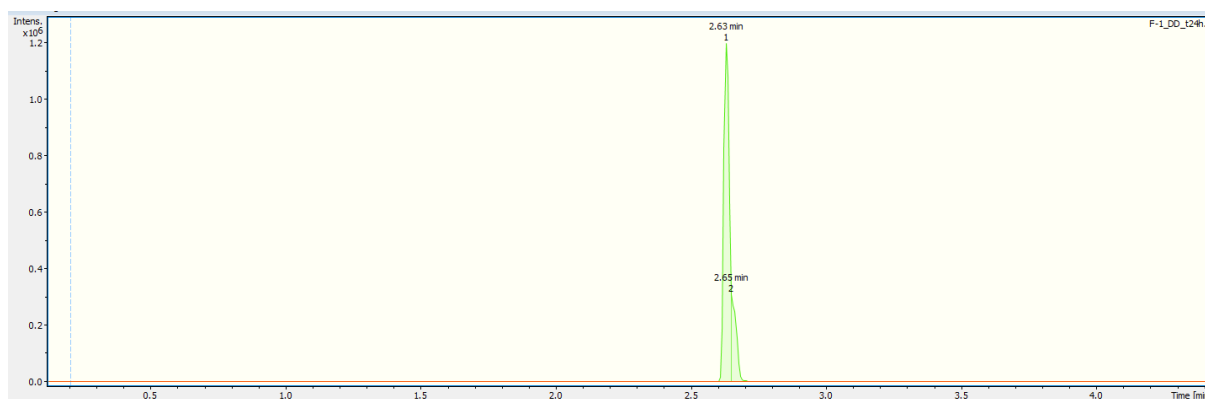

**Supplementary figure S4.** Chromatogram of degradation products of fentanyl in DahlgrenDecon detected by UHPLC-HRMS after 24h

**Supplementary table S5.** Degradation products of carfentanil in 10 %  $H_2O_2$  detected by UHPLC-HRMS after 24 h.

| #             | RT (min) | % signal of carfentanil reference | EIC ( $m/z$ ) | Ion formula (incl. $H^+$ ) | Comment        |
|---------------|----------|-----------------------------------|---------------|----------------------------|----------------|
| 1             | 1.55     | <1                                | 291.170       | $C_{16}H_{23}N_2O_3$       | Norcarfentanil |
| 2             | 2.68     | <1                                | 427.2227      | $C_{24}H_{31}N_2O_5$       | + $O_2$        |
| 3             | 2.74     | <1                                | 427.2227      | $C_{24}H_{31}N_2O_5$       | + $O_2$        |
| 4 Carfentanil | 2.77     | 13                                | 395.233       | $C_{24}H_{31}N_2O_3$       |                |
| 5             | 2.81     | 84                                | 411.228       | $C_{24}H_{31}N_2O_4$       | + O (N-oxide)  |

Extracted ion chromatogram = EIC, retention time = RT.

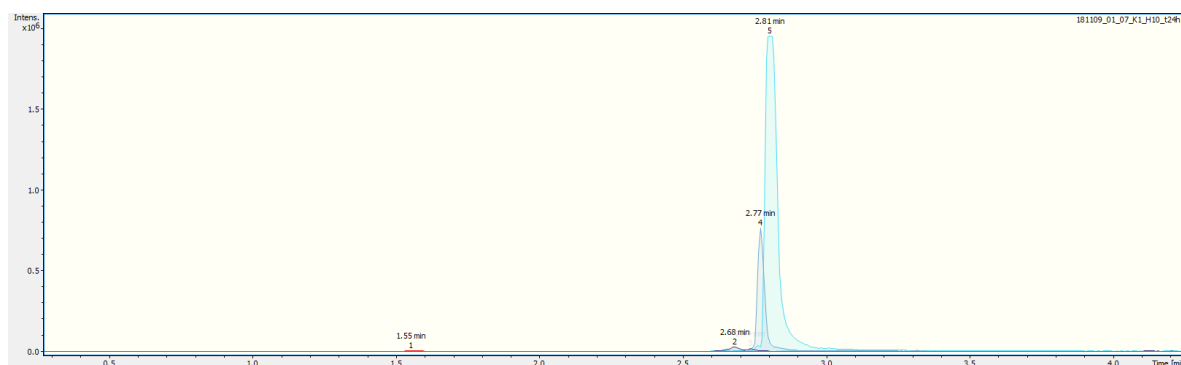

**Supplementary figure S5.** Chromatogram of degradation products of carfentanil in 10 %  $H_2O_2$  detected by UHPLC-HRMS after 24 h.

**Supplementary table S6.** Degradation products of carfentanil in bleach detected by UHPLC-HRMS after 24 h.

| #           | RT (min) | % signal of carfentanil reference | EIC ( $m/z$ ) | Ion formula (incl. $H^+$ ) | Comment                             |
|-------------|----------|-----------------------------------|---------------|----------------------------|-------------------------------------|
| 1           | 0.80     | 2.5                               | 192.102       | $C_{11}H_{14}NO_2$         | $-C_{13}H_{17}NO$                   |
| Carfentanil | 2.78     | <1                                | 395.233       | $C_{24}H_{31}N_2O_3$       |                                     |
| 3           | 2.81     | 10.6                              | 411.227       | $C_{24}H_{31}N_2O_4$       | + O (N-oxide)                       |
| 4           | 3.10     | 3.4                               | 258.089       | $C_{12}H_{17}NO_3Cl$       | $-C_{12}H_{14}NO + Cl$              |
| 5           | 3.16     | <1                                | 383.195       | $C_{22}H_{27}N_2O_4$       | $-C_2H_4 + O$                       |
| 6           | 3.26     | <1                                | 228.078       | $C_{11}H_{15}NO_2Cl$       | $-C_{13}H_{16}NO + Cl$              |
| 7           | 3.49     | 24                                | 325.14        | $C_{16}H_{22}N_2O_3Cl$     | $-C_8H_9 + Cl$ (Norcarfentanil+Cl?) |

Extracted ion chromatogram = EIC, retention time = RT.

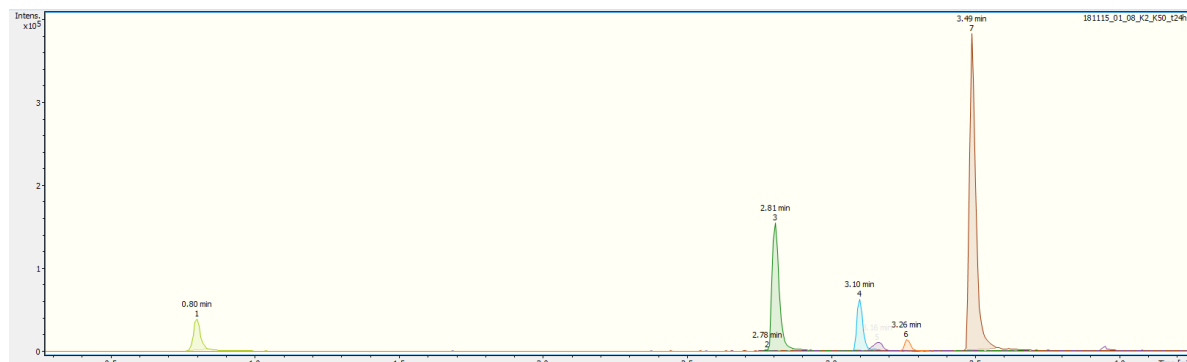

**Supplementary figure S6.** Chromatogram of degradation products of carfentanil in bleach detected by UHPLC-HRMS after 24 h.

**Supplementary table S7.** Degradation products of carfentanil in alledcont MED, detected by UHPLC-HRMS after 20 h.

| #           | RT (min) | % signal of carfentanil reference | EIC ( $m/z$ ) | Ion formula (incl. $H^+$ ) | Comment                             |
|-------------|----------|-----------------------------------|---------------|----------------------------|-------------------------------------|
| 1           | 0.79     | <1                                | 192.102       | $C_{11}H_{14}NO_2$         | $-C_{13}H_{17}NO$                   |
| 2           | 2.67     | <1                                | 150.091       | $C_9H_{12}NO$              | $-C_{15}H_{19}NO_2$                 |
| Carfentanil | 2.77     | 1.6                               | 395.233       | $C_{24}H_{31}N_2O_3$       |                                     |
| 4           | 2.81     | 7.5                               | 411.228       | $C_{24}H_{31}N_2O_4$       | + O (N-oxide)                       |
| 5           | 3.09     | <1                                | 258.089       | $C_{12}H_{17}NO_3Cl$       | $-C_{12}H_{14}N + Cl$               |
| 6           | 3.49     | 6.6                               | 325.14        | $C_{16}H_{22}N_2O_3Cl$     | $-C_8H_9 + Cl$ (norcarfentanil+Cl?) |
| 7           | 3.59     | <1                                | 361.071       | $C_{15}H_{19}N_2O_4Cl_2$   | $-C_9H_{12} + Cl_2O$                |

Extracted ion chromatogram = EIC, retention time = RT.

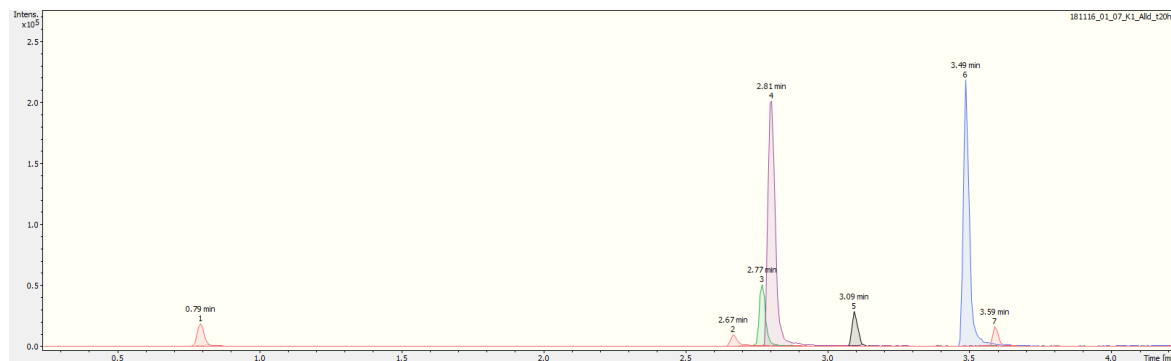

**Supplementary figure S7.** Chromatogram of degradation products of carfentanil in alledcont MED detected by UHPLC-HRMS after 20 h.

**Supplementary table S8.** Degradation product of carfentanil in NaOH detected by UHPLC-HRMS after 21 h.

| #           | RT (min) | % signal of carfentanil reference | EIC ( $m/z$ ) | Ion formula (incl. H <sup>+</sup> )                           | Comment          |
|-------------|----------|-----------------------------------|---------------|---------------------------------------------------------------|------------------|
| 1           | 2.64     | <1                                | 281.2173      | C <sub>23</sub> H <sub>29</sub> N <sub>2</sub> O <sub>3</sub> | -CH <sub>2</sub> |
| Carfentanil | 2.77     | 21                                | 395.233       | C <sub>24</sub> H <sub>31</sub> N <sub>2</sub> O <sub>3</sub> |                  |

Extracted ion chromatogram = EIC, retention time = RT.

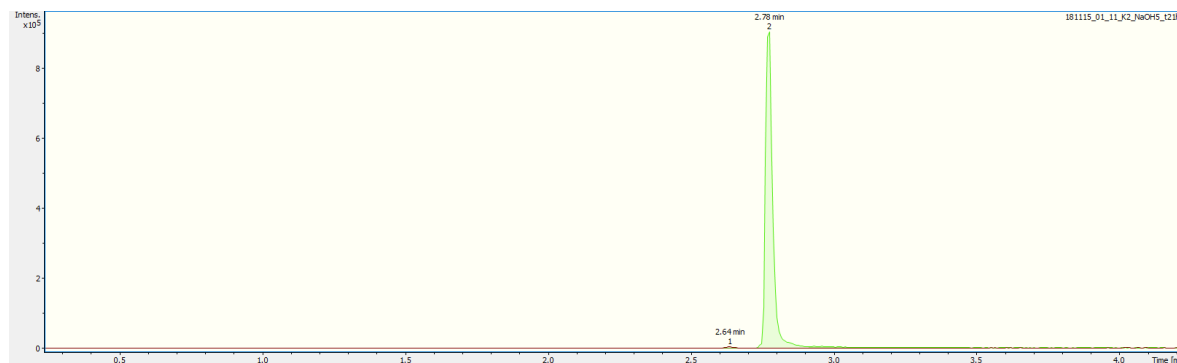

**Supplementary figure S8.** Chromatogram of degradation products of carfentanil in NaOH detected by UHPLC-HRMS after 21 h.

**Supplementary table S9.** Degradation products of carfentanil in DahlgrenDecon detected by UHPLC-HRMS after 24 h.

| #           | RT (min) | % signal of carfentanil reference | EIC ( $m/z$ ) | Ion formula (incl. H <sup>+</sup> )                           | Comment       |
|-------------|----------|-----------------------------------|---------------|---------------------------------------------------------------|---------------|
| Carfentanil | 2.65     | <0.3                              | 395.233       | C <sub>24</sub> H <sub>31</sub> N <sub>2</sub> O <sub>3</sub> |               |
| 1           | 2.67     | 99                                | 411.228       | C <sub>24</sub> H <sub>31</sub> N <sub>2</sub> O <sub>4</sub> | + O (N-oxide) |

Extracted ion chromatogram = EIC, retention time = RT.

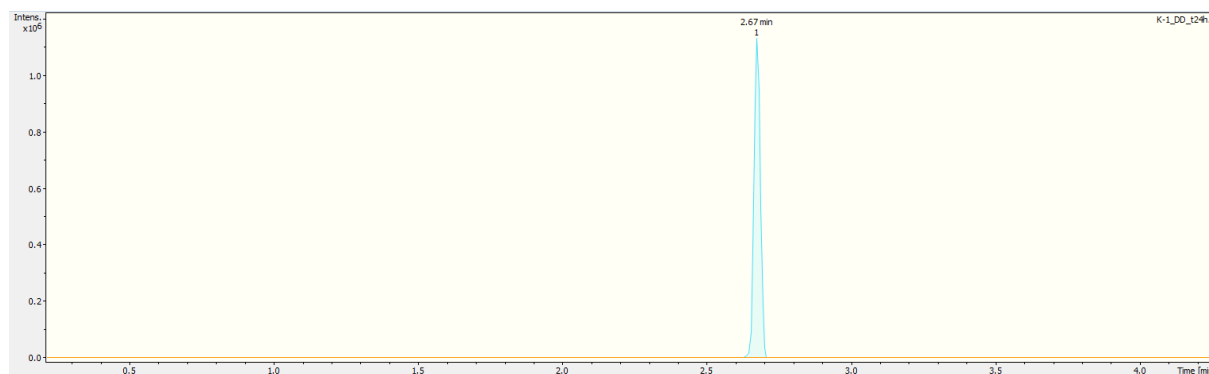

**Supplementary figure S9.** Chromatogram of degradation products of carfentanil in DahlgrenDecon detected by UHPLC-HRMS after 24 h.

## GC/HRMS data for detected degradation products

Aliquots (100  $\mu$ L) of degradation solutions were extracted using  $2 \times 500 \mu$ L of dichloromethane. The percentage signal of the fentanyl reference was determined. The extracts were analyzed by GC-HRMS using a Thermo Scientific Exactive GC Orbitrap GC/MS system. The experimental GC conditions were as follows: initial temperature of 40  $^{\circ}$ C for 1 minute, followed by ramping the temperature at 10  $^{\circ}$ C per minute until 300  $^{\circ}$ C, then maintaining the temperature at 300  $^{\circ}$ C for 5 minutes. A DB-5MS column (30 m length, 0.25 mm inner diameter, 0.25  $\mu$ m film thickness), injection volume of 1  $\mu$ L and injection temperature of 280  $^{\circ}$ C were used. Mass spectrometry parameters were as follows: scan range 30-750  $m/z$ , scan rate 12 Hz, resolution 30k, ion source temperature 230  $^{\circ}$ C, transfer line temperature 250  $^{\circ}$ C. Data analysis was performed using Thermo Xcalibur software in combination with NIST17.

**Supplementary table S10.** Degradation products of fentanyl and carfentanil detected by GC-HRMS in different decontamination solutions presented as % signal of the fentanyl/carfentanil reference.

|             | Decontamination solution             | C <sub>9</sub> H <sub>11</sub> NO<br>Mw 149.19 | C <sub>8</sub> H <sub>8</sub><br>Mw 104.15 | Norfentanyl<br>C <sub>14</sub> H <sub>20</sub> N <sub>2</sub> O<br>Mw 232.32 | C <sub>6</sub> H <sub>4</sub> ClNO <sub>2</sub><br>Mw 157.55 | C <sub>16</sub> H <sub>22</sub> N <sub>2</sub> O <sub>3</sub><br>Mw 290.36 | C <sub>8</sub> H <sub>8</sub> O<br>Mw 120.15 | C <sub>6</sub> H <sub>3</sub> Cl <sub>2</sub> NO <sub>2</sub><br>Mw 192.00 | C <sub>6</sub> H <sub>2</sub> Cl <sub>3</sub> NO <sub>2</sub><br>Mw 226.44 |
|-------------|--------------------------------------|------------------------------------------------|--------------------------------------------|------------------------------------------------------------------------------|--------------------------------------------------------------|----------------------------------------------------------------------------|----------------------------------------------|----------------------------------------------------------------------------|----------------------------------------------------------------------------|
| Fentanyl    | H <sub>2</sub> O <sub>2</sub> (10 %) | 8 %                                            | 11 %                                       | 5 %                                                                          |                                                              |                                                                            |                                              |                                                                            |                                                                            |
|             | aldehydecont MED                     | 2 %                                            | < 1 %                                      |                                                                              |                                                              |                                                                            |                                              |                                                                            |                                                                            |
|             | bleach                               | < 1 %                                          |                                            |                                                                              | < 1 %                                                        |                                                                            |                                              | <1%                                                                        | < 1%                                                                       |
| Carfentanil | H <sub>2</sub> O <sub>2</sub> (10 %) | 12 %                                           | 16 %                                       |                                                                              |                                                              | 4 %                                                                        | < 1 %                                        |                                                                            |                                                                            |
|             | aldehydecont MED                     | 2 %                                            | < 1 %                                      |                                                                              |                                                              | < 1%                                                                       |                                              |                                                                            |                                                                            |
|             | bleach                               | 2 %                                            | < 1 %                                      |                                                                              |                                                              | < 1 %                                                                      |                                              |                                                                            |                                                                            |

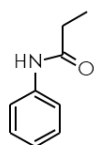

Molecular Formula: C<sub>9</sub>H<sub>11</sub>NO  
Formula Weight: 149.19

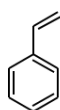

Molecular Formula: C<sub>8</sub>H<sub>8</sub>  
Formula Weight: 104.15

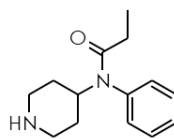

Molecular Formula: C<sub>14</sub>H<sub>20</sub>N<sub>2</sub>O  
Formula Weight: 232.32

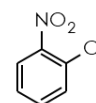

Molecular Formula: C<sub>6</sub>H<sub>4</sub>ClNO<sub>2</sub>  
Formula Weight: 157.55

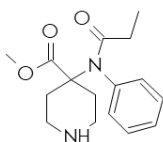

Molecular Formula: C<sub>16</sub>H<sub>22</sub>N<sub>2</sub>O<sub>3</sub>  
Formula Weight: 290.36

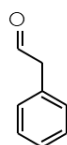

Molecular Formula: C<sub>8</sub>H<sub>8</sub>O  
Formula Weight: 120.15

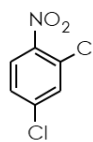

Molecular Formula: C<sub>6</sub>H<sub>3</sub>Cl<sub>2</sub>NO<sub>2</sub>  
Formula Weight: 192.00

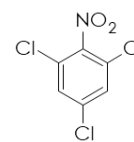

Molecular Formula: C<sub>6</sub>H<sub>2</sub>Cl<sub>3</sub>NO<sub>2</sub>  
Formula Weight: 226.44

**Supplementary figure S10.** Degradation products of fentanyl and carfentanil detected by GC-HRMS in different decontamination solutions.

## Dose-response curves for N-oxide activation of the human $\mu$ -opioid receptor

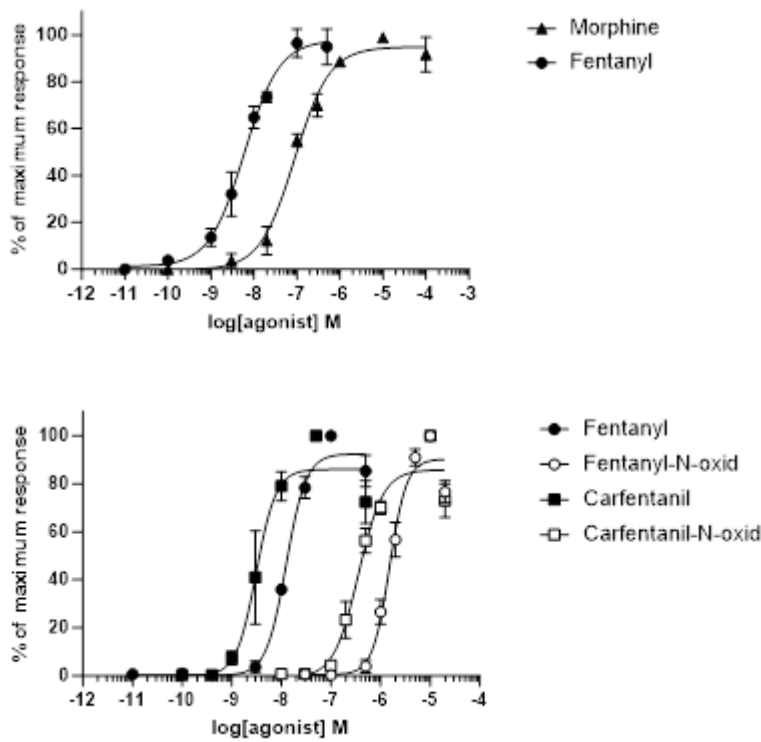

Supplementary figure S11. Dose-response curves measured in the human  $\mu$ -opioid receptor activation assay.

## Metabolism data of fentanyl- and carfentanil N-oxides in human liver microsomes

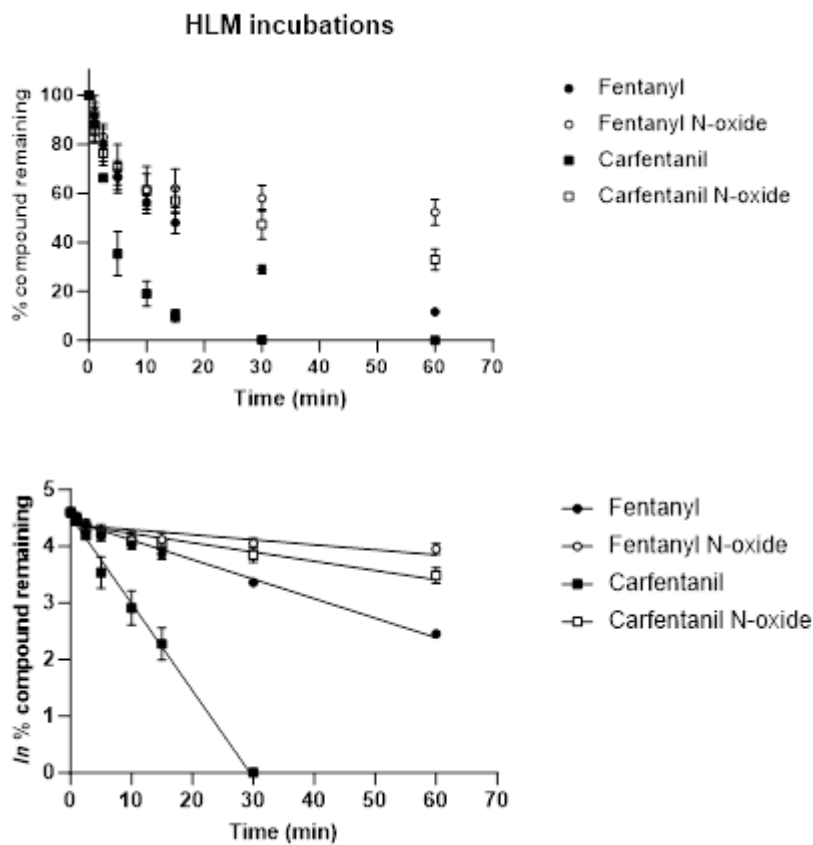



**Supplementary figure S12.** Human liver microsome (HLM) incubations. Compound depletion over 60 minutes, and log linear regression of percentage of compound remaining against time for calculation of compound half-life in HLM.

### Representative SEM images

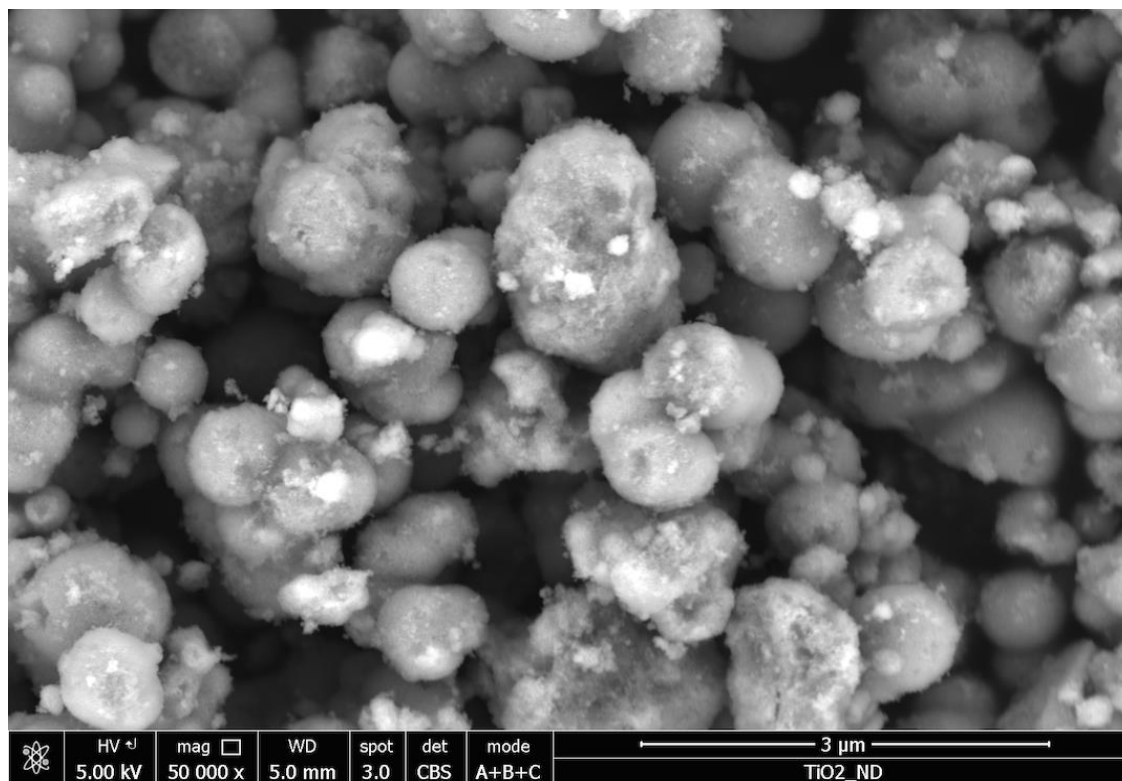

**Supplementary figure S13.** Representative SEM image of the TiO<sub>2</sub>-ND sample. The crystallite size was about 10 nm, the BET surface area 232 m<sup>2</sup>/g and total pore volume 0.28 cm<sup>3</sup>/g.

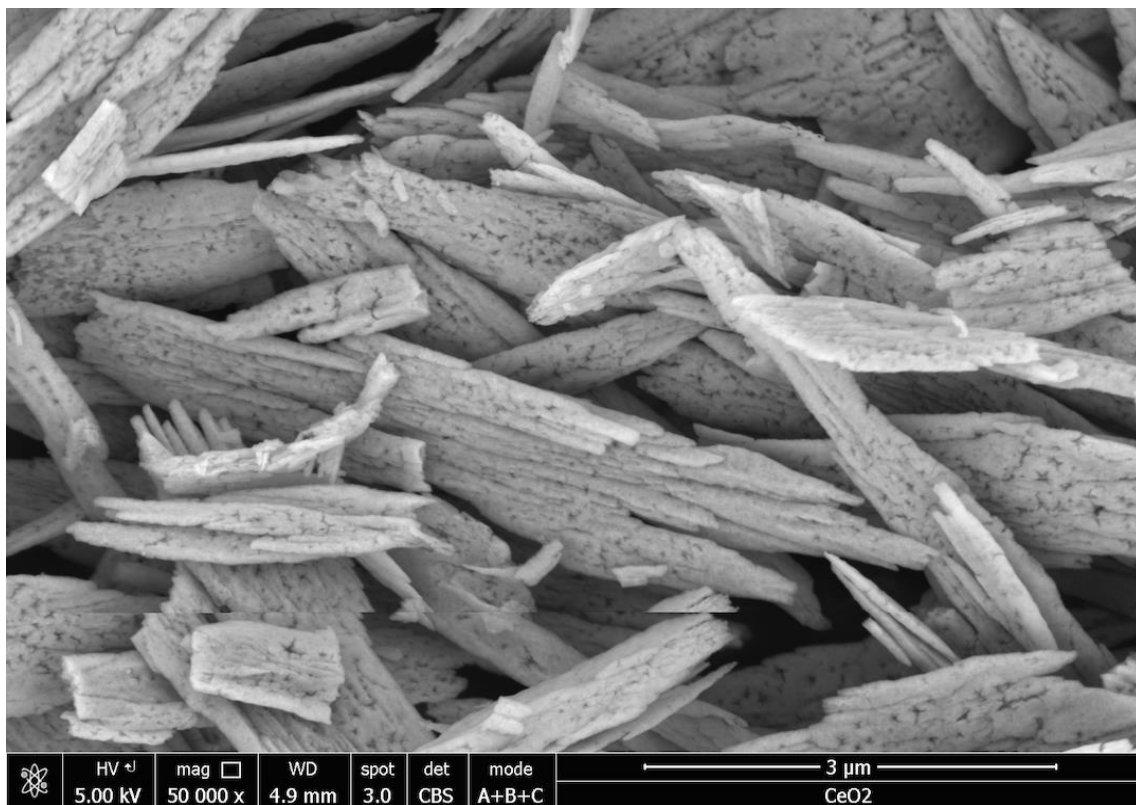

**Supplementary figure S14.** Representative SEM image of the CeO<sub>2</sub> sample. The crystallite size was about 28 nm, BET surface area 85 m<sup>2</sup>/g and total pore volume 0.07 cm<sup>3</sup>/g.

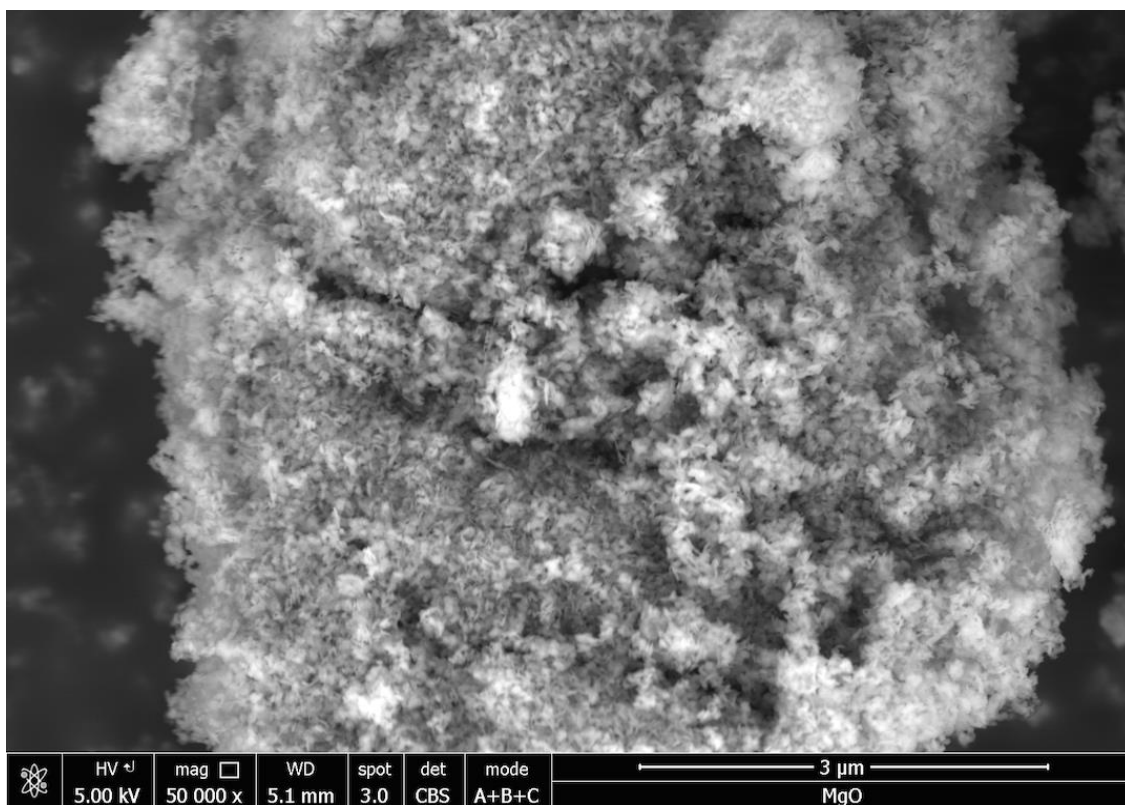

**Supplementary figure S15.** Representative SEM image of the MgO sample. The BET surface area was about 125 m<sup>2</sup>/g.

## Stability of fentanyl, fentanyl N-oxide and carfentanil in water and acetonitrile

The compounds were dissolved in both Milli-Q water and acetonitrile to a concentration of 10 µg/ml and 2 µg/ml, respectively. The same sample were then analyzed for two consecutive days, and stored in room temperature in-between analysis. The samples were also analyzed three times in a row to calculate the relative standard deviation (RDS%) between runs. The results showed that the RDS% between runs were between 3-6 % depending on compound. As shown in Figure S16 and S17, fentanyl, fentanyl N-oxide and carfentanil where all stable in both water and acetonitrile when stored in room temperature for two days.

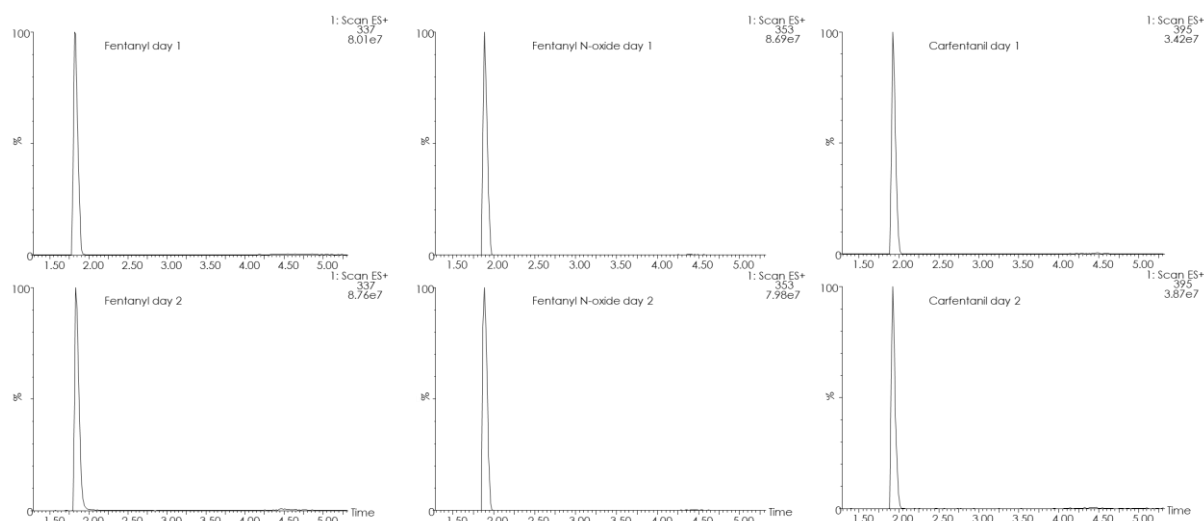

**Supplementary figure S16.** Mass chromatogram of fentanyl ( $m/z = 337$ ), fentanyl N-oxide ( $m/z = 353$ ) and carfentanil ( $m/z = 395$ ) dissolved in Milli-Q water. The same sample was analysed for two consecutive days. The relative standard deviation was between 0.5 % for N-oxide and 8.0 % for carfentanil.

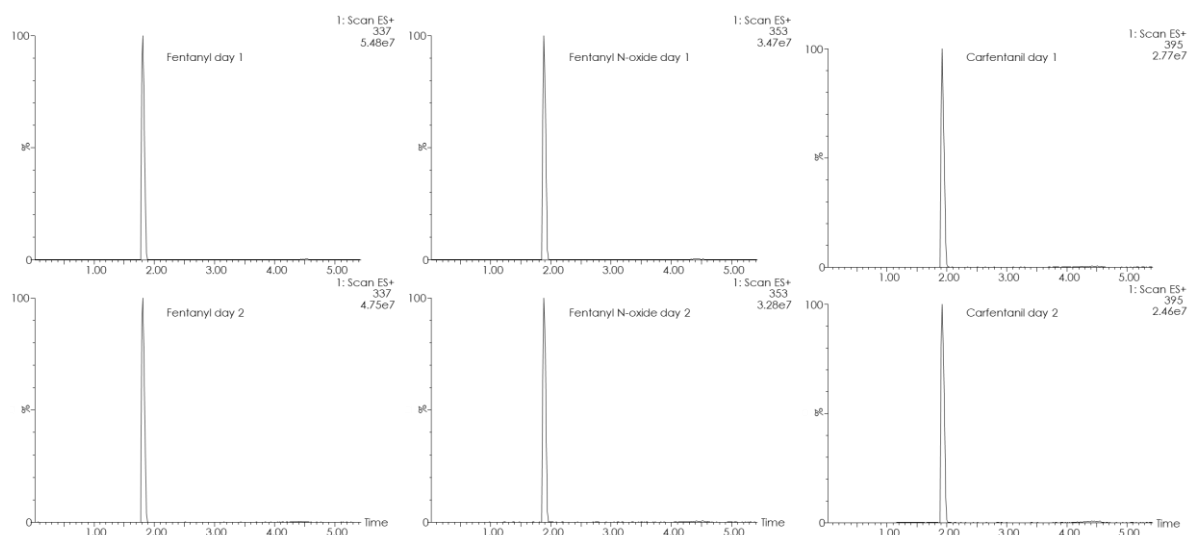

**Supplementary figure S17.** Mass chromatogram of fentanyl ( $m/z = 337$ ), fentanyl N-oxide ( $m/z = 353$ ) and carfentanil ( $m/z = 395$ ) dissolved in acetonitrile. The same sample was analysed for two consecutive days. The relative standard deviation was between 2.2 % for fentanyl and 8.3 % for fentanyl N-oxide.
